# Supplementary material
Source: HighWire-hosted journal article supplement (https://www.cmajopen.ca/highwire/filestream/80887/field_highwire_adjunct_files/0/open-2014-0110-1-at.pdf)

## Appendix 1: Flow chart depicting creation of cohort

### Deliveries

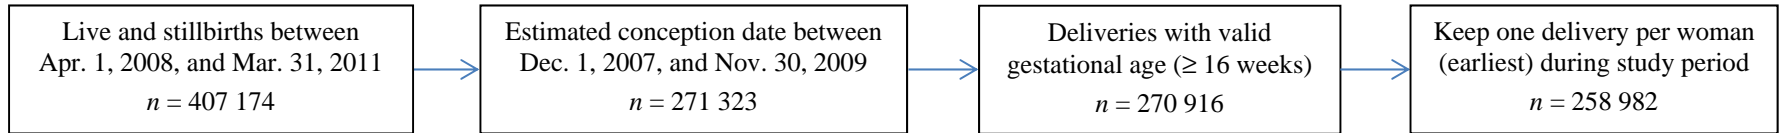

### Abortions among women without a delivery during the study period

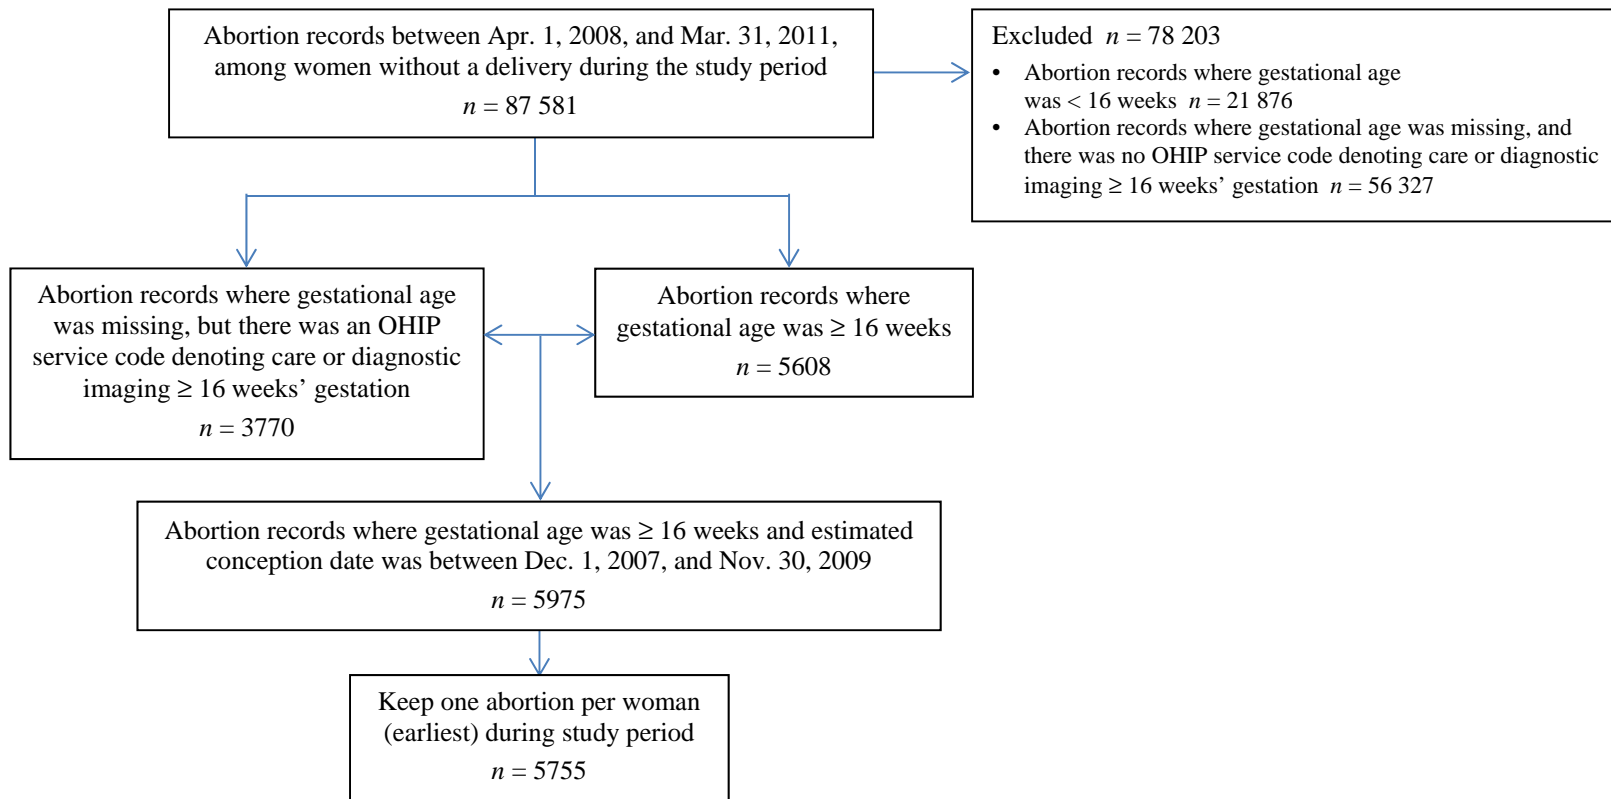

Supplement: open-2014-0110-1-at.pdf [file open-2014-0110-1-at.pdf]
